1 **Association between the skin microbiome and MHC class II diversity in an amphibian**

2 Cortazar-Chinarro, M<sup>1,2,3</sup>, Richter-Boix, A<sup>4</sup>, Rodin-Mörch, P<sup>1</sup>, Halvarsson, P<sup>5</sup>, Logue, JB<sup>6,7</sup>,  
3 Laurila, A<sup>1</sup> and Höglund, J<sup>1</sup>

4

5 <sup>1</sup>Animal Ecology/ Department of Ecology and Genetics, Uppsala University, Norbyvägen  
6 18D, SE-75236 Uppsala, Sweden

7 <sup>2</sup>MEMEG/Department of Biology, Lund University, Sölvegatan 37, SE-22362 Lund, Sweden.

8 <sup>3</sup>Department of Earth Ocean and Atmospheric sciences/ Faculty of Science 2020 – 2207 Main  
9 Mall Vancouver, BC Canada V6T 1Z4

10 <sup>4</sup>Department of Political and Social Science, Pompeu Fabra University, Ramon Trias Fargas  
11 25-27, 08005 Barcelona, Spain

12 <sup>5</sup>Parasitology/Department of Biomedical Sciences and Veterinary Public Health, Swedish  
13 University of Agricultural Sciences, Ulls väg 26, P.O. Box 7036, SE-75007 Uppsala, Sweden

14 <sup>6</sup>Aquatic Ecology/Department of Biology, Lund University, Sölvegatan 37, SE-22362 Lund,  
15 Sweden

16 <sup>7</sup>SLU University Library, Swedish University of Agricultural Sciences, Almas allé 12, P.O.  
17 Box 7071, SE-75007 Uppsala, Sweden

18 Corresponding author: maria.cortazar@biol.lu.se,

19

20 **Abstract**

21 It has become clear that the microbiome plays an important role in determining host health,  
22 diseases, and phenotypic variation. There is increasing evidence that the microbiome  
23 influences host fitness and its adaptation to the environment is changing our thinking on host-  
24 microbe interactions. However, it remains unclear how a host genotype shapes its  
25 microbiome. Here, we explored how genetic background and evolutionary history influence  
26 associated microbiome in amphibian populations. We studied how skin bacterial diversity is  
27 associated with the Major Histocompatibility Complex (MHC) class II exon 2 diversity in 12  
28 moor frog populations belonging to two geographical clusters that show signatures of past and  
29 ongoing differential selection patterns. We found that bacterial alpha-diversity remained  
30 similar between the two clusters, while MHC haplotype-supertypes and genetic diversity  
31 differed between the clusters. Bacterial alpha-diversity was positively correlated with  
32 expected MHC heterozygosity and negatively with MHC nucleotide diversity. We also found  
33 that bacterial community composition differed significantly between the two geographic  
34 clusters and between specific MHC supertypes. These findings further suggest that population  
35 historical demographic events influence hologenomic variation and provide new insights into  
36 how immunogenetic host variability and microbial diversity may jointly influence host fitness  
37 with consequences for disease susceptibility and population persistence.

38 **Keywords:** MHC Class II beta chain, microbiota, *Rana.arvalis*,

39

## 40 **Introduction**

41 All complex organisms carry numerous microbes forming diverse microbial communities in  
42 many organs including the skin, lungs, and gut (Antwis, Fry, James, & Ferry, 2020; Müller,  
43 Vogel, Bai, & Vorholt, 2016; Zilber-Rosenberg & Rosenberg, 2008). These microbial  
44 communities contribute to the function of these organs: millions of years of intimate  
45 interactions between the host and its microbiome have forged pervasive interconnections  
46 between both parties. The microbiome plays a fundamental role in the development and  
47 function of the host immune system in both plants and animals. However, at the same time,  
48 the host immune system has been proposed to act as the resistant environment that imposes  
49 ecological filters on the microbial organisms, and thereby has the potential to shape host  
50 microbial communities (Hooper, Littman, & Macpherson, 2012; Lee & Mazmanian, 2010;  
51 Thaiss, Zmora, Levy, & Elinav, 2016). While the potential importance of the interactions  
52 between microbiome and immune system in determining the health of organisms has been  
53 studied in a few organisms, within-species diversity of microbiomes remains largely  
54 unstudied in non-human organisms (Bolnick et al., 2014; Garud & Pollard, 2020; Montero et  
55 al., 2021).

56 Major histocompatibility complex (MHC) genes encode proteins essential for the adaptive  
57 immune response of jawed vertebrates (Flajnik & Kasahara, 2001; Ohta et al., 2000). These  
58 molecules are essential for cell-mediated immunity and appeared early in the evolution of the  
59 adaptive immune system 500 million years ago (Flajnik & Kasahara, 2001; Rock, Reits, &  
60 Neefjes, 2016). The extensive population-level allelic diversity observed for these genes,  
61 alongside their central role in the vertebrate immune system, make them ideal candidates for  
62 studying how the host immune system affects its microbiota composition in wild populations.  
63 The study of this relationship in wild populations will also help understanding the reciprocal  
64 interplay between microbiota and the immune system shaping beneficial animal-microbial  
65 combinations, pathogen elimination, and disease resistance.

66 The influence of the MHC haplotype on the microbiome has been studied in all major  
67 vertebrate groups including fish (Bolnick et al., 2014), amphibians (Belasen et al., 2021;  
68 Hernández-Gómez, Briggler, & Williams, 2018), birds (Darolová, Poláček, Krištofík,  
69 Lukasch, & Hoi, 2021; Leclaire et al., 2019), and mammals (Khan et al., 2019; Kubinak et al.,  
70 2015; P. Lin et al., 2014). In humans, MHC (known as human leukocyte antigen, HLA)  
71 variants have been associated with the composition of the microbiome (Bolnick et al., 2014;  
72 Bonder et al., 2016). The results found in these studies offer three conflicting predictions on

73 MHC-microbiota interactions. 1) A negative correlation between MHC diversity and  
74 heterozygosity, and microbiota diversity (Bolnick et al., 2014; Leclaire et al., 2019) where a  
75 higher diversity of MHC haplotypes leading to higher diversity of peptides presented to  
76 eliminate a higher number of microbe species. 2) A positive relationship where higher MHC  
77 diversity causes higher microbiome diversity (Hernández-Gómez et al., 2018; Khan et al.,  
78 2019), because not only do the immune system eliminates microbes, but also forms symbiotic  
79 bonds with commensals as higher diversity of MHC haplotypes initiating tolerance to a more  
80 diverse range of microbes. 3) MHC diversity is not related with microbiome diversity but its  
81 composition, where certain MHC haplotypes interact with specific groups of microbes,  
82 resulting in covariation between MHC genotypes and microbiome community structure  
83 (Bonder et al., 2016; Olivares et al., 2015). Note that statements 2 and 3 are not mutually  
84 exclusive.

85 Understanding the causal connections between the MHC and microbiota are especially  
86 relevant in groups where virulent wildlife diseases are contributing to population declines  
87 (Fisher et al., 2012). Among these diseases, chytridiomycosis stands out as an emerging  
88 disease caused by the chytrid fungi *Batrachochytrium dendrobatidis* (Bd) and *B.*  
89 *salamandrivorans* (Bsal) inflicting amphibian mass die-offs worldwide (Kilpatrick, Briggs, &  
90 Daszak, 2010; Martel et al., 2014; Scheele et al., 2019). Recent studies demonstrate the  
91 importance of the skin microbiota in amphibian innate immune defense against Bd (Bates et  
92 al., 2018; Rebollar et al., 2016; Torres-Sánchez & Longo, 2022). Hence, investigating how  
93 host MHC genetics, environment and evolutionary history determine the skin microbial  
94 diversity and composition of amphibian populations is a priority task in amphibian  
95 conservation (Jiménez & Sommer, 2017; Trevelline, Fontaine, Hartup, & Kohl, 2019).

96 Despite recent calls for an integration of microbiome research in evolutionary and  
97 conservation biology (Cullen et al., 2020; Henry, Bruijning, Forsberg, & Ayroles, 2021; West  
98 et al., 2019), little progress has been made on the fundamental association between host  
99 population history and genetic variation, and the diversity and composition of host  
100 microbiome in wild populations. Here, we studied the variation in MHC Class II in 12 moor  
101 frog *Rana arvalis* populations from Scandinavia originating from different environments and  
102 having different evolutionary histories. Previous studies have demonstrated that the  
103 postglacial colonization processes after the Last Glacial Maximum had a profound impact on  
104 the geographical distribution of *R. arvalis* and its genetic diversity (Cortázar-Chinarro et al.,  
105 2017; Knopp & Merilä, 2009; Rödin-Mörch et al., 2019). The results indicate that current

106 patterns of MHC variation across Scandinavia reflect two different postglacial colonization  
107 routes and show signatures of past and ongoing differential selection patterns, drift, and  
108 historical demographic events, where southern populations have higher haplotype richness  
109 than the ones in the north (Cortázar-Chinarro et al., 2017; Cortazar-Chinarro, Meyer-Lucht,  
110 Laurila, & Höglund, 2018).

111 The inferred local adaptation in the moor frog is expected to not only be determined by the  
112 host genome, but also by the genetic repertoire of the microbiome, which, in turn, is affected  
113 by the major evolutionary forces of selection, drift, migration and mutation. Consequently, the  
114 host can be expected to be under strong selection to shape the microbiota and foster a  
115 beneficial microbial community (Foster, Schluter, Coyte, & Rakoff-Nahoum, 2017).  
116 Investigating this relationship in an evolutionary context is imperative in order to understand  
117 the distribution of host-microbiome biodiversity, its evolutionary association history and the  
118 forces that have generated it (Groussin, Mazel, & Alm, 2020).

119 Here, we ask the following questions: (i) Does geography and/or host evolutionary history  
120 affect the diversity and structure of the skin microbiota? (ii) Is MHC heterozygosity correlated  
121 with microbial diversity? (iii) How does MHC diversity affect microbiome? and (iv) Does  
122 MHC haplotype similarity correlate with microbial diversity and/or skin microbiota  
123 composition?

## 124 **Methods**

### 125 **Study sites and sampling**

126 *Rana arvalis* has a broad longitudinal and latitudinal distribution in Eurasia and is relatively  
127 common in most of Fennoscandia (Wielstra, Sillero, Vörös, & Arntzen, 2014). Previous  
128 studies showed a bidirectional postglacial colonization route of the species to Scandinavia: a  
129 western lineage coming from the south via Denmark to Southern Sweden and another lineage  
130 arriving from the east via Finland to northern Sweden (Cortázar-Chinarro et al., 2017; Knopp  
131 & Merilä, 2009; Rödin & Mörch et al., 2019). Eight sites close to Uppsala (Uppland region,  
132 henceforward termed ‘South’) corresponding to the western lineage and four sites in Luleå  
133 (Norrbotten region, henceforth called ‘North’) corresponding to the eastern lineage were  
134 selected as sampling locations in this study. Study sites within each region were at least 8 km  
135 apart and differing in habitat (i.e., from open farm ponds to forest ponds). Sampling was  
136 conducted during the breeding season in March – April (South) and May (North) 2016 (Table  
137 S1).

138 A total of 207 adult frogs were captured using hand nets. Each individual was handled with a  
139 new pair of sterile nitrile gloves to avoid cross contamination. All individuals were sexed and  
140 weighed prior to sample collection. Sample collection included removal of a piece of tissue  
141 from the toe webbing and storing it in 90% alcohol for DNA extraction. To sample the skin  
142 microbiome, each frog was transferred to an individual 250 mL container containing sterile  
143 distilled water (the Millipore Milli-Q™; Fisher Scientific) to remove transient microbes from  
144 the environment. After five minutes, each animal was moved to a new container with sterile  
145 distilled water and kept there for another two minutes. Finally, each frog was manually  
146 cleansed (again with sterile distilled water; ddH<sub>2</sub>O). The frogs were then carefully swabbed  
147 with a sterile rayon tipped MW100 (mwe; medical wire & Equipment Co) six times on both  
148 dorsal and ventral surfaces, covering as much skin as possible. Swabs were transported on ice  
149 in cooler boxes prior to storage at -80 °C in the laboratory.

150 To control for environmental microbes that might be found on the frogs' skin, a 2L-water  
151 sample was taken from every study site. Water samples were taken within close proximity to  
152 where the frogs were captured from using a sterilized Durham glass bottle. Samples were kept  
153 cold and dark until processed in the laboratory. Water samples were filtered under a sterilized  
154 hood in the laboratory in the night of collection. As a pre-filtration step, two blank filtered  
155 samples (FNC1 and FNC2) were obtained from every water sample after filtering 200 mL  
156 DNA/RNA-free Milli-Q water. Bacterioplankton cells were collected onto 0.2 µm membrane  
157 filters (Super-200 Membrane Disc Filters; Pall Corporation, East Hills, USA), filtering 0.2 L  
158 of pre-filtered (0.7 µm; membrane filter) water. Pre-filtration was carried out to avoid  
159 capturing larger particles. Four water samples were taken at each site. Filters were kept at -80  
160 °C until DNA extraction.

161 The temperature of every pond was recorded at the day of sampling using a portable  
162 multiparameter meter. Monthly temperature and precipitation (Worldclim data base:  
163 <http://www.worldclim.org> average of 30 years) at each sampling location were extracted to  
164 estimate the average values of these bioclimatic variables from the beginning of the breeding  
165 season in March to the end of the growing season in October.

## 166 **DNA extraction and Illumina MiSeq library preparation and sequencing**

### 167 *MHC Class II exon 2*

168 The DNA from the tissue was extracted by using the DNeasy Blood and Tissue kit (Qiagen,  
169 Sollentuna, Sweden) following the manufacturer's instructions. The complete second exon

170 (272 bp) of the single MHC II gene (corresponding to the  $\beta$  -2 domain) in *R. arvalis* was  
171 amplified using the primers ELF\_1 (3'- GAGGTGATCCCTCCAGTCAGT-5') and ELR\_2  
172 (3'-GCATAGCAGACGGAGGAGTC-5) (Cortázar-Chinarro et al., 2017). Both forward and  
173 reverse primers were modified for Illumina MiSeq sequencing with an individual 8 bp  
174 barcode and a “NNN” sequence (to facilitate cluster identification). PCR reactions and library  
175 preparation are described in detail in Cortazar-Chinarro et al. (2017). A total of six libraries  
176 were generated using the ThruPLEX DNA-seq 6S (12) kit (Takara Bio Europe, TOWN,  
177 France). The concentration of each sample pool was measured with Quant-iT PicoGreen  
178 dsDNA assay kit (Invitrogen Life Technologies, Stockholm, Sweden) on a fluorescence  
179 microplate reader (Ultra 384; Tecan Group Ltd., Männedorf, Switzerland). The six libraries  
180 were combined in equimolecular amount of each sample into a MiSeq run, prior to  
181 sequencing. Sequencing of two MiSeq 250 (rxn) runs were carried out at the NGI/SciLifeLab  
182 Uppsala (Sweden).

### 183 *Bacterial DNA extraction and library construction.*

184 The whole community DNA was extracted from both the swabs and filters using the DNeasy  
185 PowerSoil kit (Qiagen) following the manufacturer’s recommendations. Extracted DNA was  
186 sized and quantified by means of agarose (1.5 %) gel electrophoresis, GreenGel staining  
187 (Biotium Inc., Hayward, USA), and safe blue light transillumination prior to PCR  
188 amplification.

189 The bacterial swab and lake samples were subjected to 16S rRNA gene amplicon sequencing  
190 on an Illumina MiSeq platform (Illumina Inc., San Diego, USA). The sequencing library was  
191 prepared according to a two-step PCR. The first PCR step (30 cycles) amplified the bacterial  
192 hypervariable region V4 of the 16S rDNA gene, using bacterial forward primer 515F (5'-  
193 GTGCCAGCMGCCGCGGTAA -3') and reverse primer 806R (5'-  
194 GGACTACHVGGGTWTCTAAT -3') (Varg et al., 2022). The second PCR step (20 cycles)  
195 attached indices to both ends of the 16S amplicons in order to create a unique dual barcode for  
196 each individual sample (See Table S2 and additional information A1). The 16S primers used  
197 in the first PCR step were, thus, modified by means of extending their 5'-ends with Illumina  
198 adapter sequences, These barcoding primers also comprised the Illumina sequencing handle  
199 sequence, which attaches the amplicons onto the Illumina flow cell to initiate sequencing. In  
200 both PCR steps, the Phusion high-fidelity DNA polymerase (ThermoFisher Scientific,  
201 Stockholm, Sweden) was used, and PCR mixtures were each time prepared according to the  
202 manufacturer’s instructions with the addition of 20mg/mL of BSA (Bovine Serum Albumina,

203 Thermo fisher, Stockholm, Sweden). Also, amplicons were purified after each PCR step using  
204 the Agencourt AMPure XP purification kit (Beckman Coulter Inc., Brea, USA), and amplicon  
205 fragment size and quantification were checked using a Bioanalyzer (Agilent) and a  
206 fluorescence microplate reader (Ultra 384; Tecan Group Ltd., Männedorf, Switzerland),  
207 employing the Quant-iT PicoGreen dsDNA quantification kit (Invitrogen). Finally, equimolar  
208 amounts of samples were mixed, and the final amplicon sequenced using the Illumina MiSeq  
209 platform (Illumina Inc.) at NGI/SciLifeLab Uppsala (Sweden).

#### 210 *MHC Class II exon 2 sequence processing*

211 Sequence processing was performed following (Cortázar-Chinarro et al., 2017). The raw  
212 amplicon sequencing was combined into single forward reads using FLASH (Magoč &  
213 Salzberg, 2011). Each of the six amplicon pools was analyzed independently. A total of 6  
214 fastq files were generated and transformed to fasta by using Avalanche NextGen package  
215 (DNA Baser Sequence Assembler v4 (2013), Heracle BioSoft, [www.DnaBaser.com](http://www.DnaBaser.com)).  
216 AmpliCHECK (Sebastian, Herdegen, Migalska, & Radwan, 2016) was used for removal of  
217 primer sequences, de-multiplexing, chimera removal and counting variants for each amplicon,  
218 while AmpliSAS (Sebastian et al., 2016) was used for final allele verification. The DOC  
219 method (Lighten, Van Oosterhout, Paterson, McMullan, & Bentzen, 2014) was used, where  
220 variants are sorted top-down by coverage, followed by the calculation of the coverage break  
221 point (DOC statistic) around each variant. Individuals in which replicate samples due to PCR  
222 artefacts that did not reveal identical genotypes were removed from the consecutive analyses.  
223 We retained samples that were revealing an identical genotype for at least two out of three  
224 replicates. All valid allele sequences from 179 retained individuals were imported and  
225 aligned in MEGA X (Kumar, Stecher, Li, Knyaz, & Tamura, 2018). All sequences were  
226 extensively compared to other sequences from the same locus (*R. arvalis*: GenBank: isolates  
227 from h1 to h57 [MT002608.1- MT002664.1]). We used the MHC nomenclature by (Klein  
228 1975) for the valid retained alleles. This nomenclature consists of a four-digit abbreviation of  
229 the species name followed by gene\*numeration, e.g. Raar\_DAB\*01.

#### 230 *Bioinformatic processing of bacterial data*

231 Raw sequences were processed using DADA2 (Callahan et al., 2016). Forward and reverse  
232 reads were trimmed to 240 and 200 bp, respectively, using default parameters. Default  
233 parameters were, moreover, employed to correct for amplicon errors, identify chimeras, and  
234 merge-end reads. Taxonomic assignment following amplicon sequence variant approach



235 (ASV) was performed with the help of the bacterial 16S rRNA SILVA reference data base  
236 (version v132) training set (Yilmaz et al., 2014). All unassigned ASVs were removed from  
237 the samples (Costa, Tavares, Baptista, & Lino-Neto, 2022; Couch et al., 2021). Furthermore,  
238 to minimize erroneous ASVs, all singletons were removed according to the default settings of  
239 DADA2. The data was filtered by sample or taxa, using the functions *subest\_sample*,  
240 *prune\_taxa* () implemented in the Phyloseq R package. For statistical analyses, data was  
241 transformed into proportions (compositional data) in order to minimize erroneous ASVs and  
242 for direct count comparisons which is a modern data that do not need rarefaction to produce  
243 correct results (Cameron, Schmidt, Tremblay, Emelko, & Müller, 2020; McMurdie &  
244 Holmes, 2014; Willis, 2019). We used used the function *transform\_sample\_counts* (*ps*,  
245 *function (out) out/sum(out)*) implemented in the Phyloseq package (McMurdie & Holmes,  
246 2013) or with package Microbiome (Shetty & Lahti, 2019) in R. We used the “*compositional*”  
247 method and “*clr*” (i.e. relative abundance methods). The analyses were verified with all the  
248 methods.

#### 249 *MHC Class II exon 2 data analyses*

250 We assessed genetic diversity in MHC Class II exon 2 using standard diversity indices (HE,  
251 HO, allelic frequencies, nucleotide diversity). These were calculated for each locality in  
252 Arlequin v 3.5 (Excoffier & Lischer, 2010). Allelic richness was calculated in FSTAT 2.9.3.2  
253 (Goudet, 1995); See Table S3). Allele frequency plots were created in R using the “*ggplot2*”  
254 package (Wickham, 2016).

255 To collapse MHC alleles into functional supertypes, we extracted the 12 codon positions for  
256 the Peptide Binding Region (PBR) according to (Cortazar-Chinarro et al., 2018). We then  
257 characterized each codon based on five physiochemical descriptor variables: z1  
258 (hydrophobicity), z2 (steric bulk), z3 (polarity), z4 and z5 (electronic effects) (Jombart,  
259 Devillard, & Balloux, 2010). A hierarchical clustering tree for the MHC class II exon 2 in *R.*  
260 *arvalis* was constructed with the z-descriptors in R (version 4.0.5). The optimal number of  
261 clusters was decided based on divergence between the branches in the phylogenetic tree.  
262 Alleles within each cluster was collapsed into a single Supertype (Figure 1). Supertype allele  
263 frequency plots were created in Excel [See Figure 1]. Note that even if we consider  
264 supertyping as useful method for investigating broad associations between MHC, microbiome  
265 and infection in field studies, we recognize the limitations of using supertypes in our study, as  
266 recent studies have demonstrated that the size of peptide repertoires is not correlated with

267 peptide motifs of many MHC class I molecules supertypes. These results call the  
268 immunological relevance of supertypes into question (Kaufman, 2020; Tregaskes & Kaufman, 2021).

### 269 *Bacterial diversity data analyses*

270 Differences in composition between the environmental pond and amphibian skin communities  
271 were examined by means of permutational multivariate analysis of variance (PERMANOVA,  
272 analysis of differences in group means based on distances, 999 mutations) and permutational  
273 multivariate analysis of dispersion (PERMDISP), analysis of differences in group  
274 homogeneities based on distances.

275 Bacterial alpha-diversity was estimated using Observed richness, Shannon diversity, and  
276 phylogenetic diversity indices. Comparisons between regions and sexes were carried out  
277 using Wilcoxon and Kruskal-Wallis tests implemented in Phyloseq (McMurdie & Holmes,  
278 2013) and Picante (Kembel & Kembel, 2014) R packages. Correlation coefficients between  
279 ASVs Observed richness and total number of reads were also assessed to demonstrate that the  
280 asymptote of the samples has been reached and thus no misinterpretation of the diversity is  
281 occurring (Figure S1). GLM and GLMMs with Gaussian error structure were used to assess  
282 whether alpha-diversity (Shannon) could be explained by the environmental factor: 1)  
283 Temperature at time of sample collection “TemCollection”, 2) Average temperature  
284 “TemMean”, and 3) Average precipitation “PreMean” on ASVs bacterial diversity.  
285 Population was included as a random factor. GLMMs models were run in R (Team, 2013).

286 Differences in bacterial composition among communities between the two regions (South and  
287 North) and sexes were analyzed using PERMANOVA by using *Adonis2()* function in Vegan  
288 package with 999 permutations and test of homogeneity of group dispersion (PERMDISP) on  
289 weighted and unweighted UniFrac distances. Relationships between the bacterial assemblages  
290 from the South and North were explored employing hierarchal cluster analyses (Bray-Curtis  
291 distance and UniFrac distances by using Vegan (Oksanen et al., 2019) and circlize (Gu, Gu,  
292 Eils, Schlesner, & Brors, 2014) packages implemented in R (Team, 2013).

### 293 *Associations between bacterial diversity and host MHC class II exon 2*

294 Relationships between MHC genetic and bacterial diversity (Shannon, Simpson and Chaos1)  
295 were analyzed by several tests. Shannon diversity index was the only diversity index that was  
296 perfectly adjusted with the structure of our data. Therefore, the analyses in the following only  
297 consider the Shannon diversity index. First, we assessed the effect of MHC heterozygosity

298 and bacterial Shannon diversity at the population level. Second, we investigated the effect of  
299 MHC nucleotide diversity and bacterial Shannon diversity at the individual level. For both,  
300 multiple regression on distance matrices (MRM) and (lm) models were used with the package  
301 Ecodist (Goslee & Urban, 2007) and nlme in R (Team, 2013).

302 Relationships between heterozygosity at the supertype level and Shannon bacterial diversity  
303 index between regions were explored by performing a GLMM model in R. Individuals were,  
304 for this purpose, grouped in two categories: “*sameS*” and “*DistinctS*”. *SameS* individuals were  
305 defined as individuals in which the two alleles belonged to the same supertype group (e.g.,  
306 Supertype2\_2), while *DistinctS* individuals carried two alleles that belong to different  
307 supertype groups (e.g., Supertype1\_3). We assume that heterozygosity is lower within the  
308 “*SameS*” group compared to the “*DistinctS*” group, as the probability of having the same two  
309 alleles is higher within “*SameS*” group. Individual Shannon diversity index was used as the  
310 response variable and region as a fixed factor with population as a random effect. Additional  
311 GLMM analyses were carried out to test for differences between bacterial diversity and  
312 specific supertype-haplotype groups within the regions. Moreover, redundancy analyses  
313 (RDA) in the Vegan package (Oksanen et al., 2019) were run to find potential indications of a  
314 relationship between bacterial community composition and supertype haplotype structure.  
315 Likewise, we used RDA to summarize linear relationship between the bacterial community  
316 composition and MHC specific supertypes.

317 DESeq2 and ANCOMBC2 was performed to explore whether specific bacterial taxa differed  
318 in abundance between “*SameS*” and “*DistinctS*” groups of individuals as well as between  
319 specific supertypes (H. Lin, Peddada, & Lin, 2021; Love, Anders, & Huber, 2014). In  
320 addition, ASV abundance and supertype data were cross-correlated to find specific taxa  
321 correlated with specific supertypes (Spearman’s rank correlations). First, we transformed  
322 abundance data into compositional data by using Microbiome package (Shetty & Lahti, 2019)  
323 in R software. The neighbor-joining tree, showing the phylogenetic relationships among  
324 ASVs negatively and positively correlated to MHC supertypes was constructed with MEGA  
325 X (Kumar et al., 2018).

## 326 **Results**

### 327 *MHC II exon 2 and Skin Microbiome characterization*

328 We obtained a total of 4.2 million reads with intact primers and attached barcode information  
329 that could be assigned to 207 individuals. We amplified and sequenced in duplicates or

330 triplicates, which corresponds to 81.8% of the total number of samples. One sample out of  
331 321 failed due to PCR amplification problems. The average number of reads per amplicon  
332 was 13085.37 ranging from 420 to 106172 reads, 2.7 million reads remained after filtering  
333 and QC analyses. We assigned 34 valid MHC class II exon 2 alleles with a length of 272 bp  
334 and 27 polymorphic nucleotide positions among the 179 remaining individuals. All the 34  
335 valid MHC II exon 2 allele sequences were translated into unique amino acid alleles. 17 out of  
336 the 34 alleles were found in a previous study (Cortázar-Chinarro et al., 2017) and another 17  
337 were new alleles discovered in the present study (Raar\_58 to Raar\_74). By following the  
338 DOC method (Lighten et al., 2014), we detected a single locus in 193 individuals. Three  
339 individuals showed evidence of a second MHC class II locus with apparently lower number or  
340 reads in two of the three replicates, pointing to the possible existence of a very rare MHC  
341 class II duplication. We conclude that we are mostly working with a single MHC class II  
342 locus in our data set. However, we cannot rule out the possibility our primers amplify an  
343 MHC class II locus in a few cases (two individuals).

344 A total of 37148 reads were obtained from both amphibian (n=179) and water samples  
345 (n=12), with amphibian swabs contributing 84.84% to the total number of reads. The most  
346 abundant phyla were Proteobacteria (45% of the total number of sequences), Bacteroidetes  
347 (16%), Actinobacteria (9.9%), Acidobacteria (6.77%), Verrucomicrobia (5.39%), and  
348 Firmicutes (3.71%). The rest of the phyla represents less than 2.5% of the total number of  
349 reads: Planctomycetes (2.1%), Chloroflexi (1.77%), Armatimonadetes (1.4%), Candidatus\_  
350 Saccharibacteria (0.81), and Gemmatimonadetes (0.75%) (Figure S2). After removal of  
351 uncharacterized taxa (n=1280 ASVs; 7.8% of the total abundance), 15017 taxa remained.

## 352 **Genetic diversity**

### 353 *MHC class II exon 2*

354 The number of alleles per population varied substantially between the northern and southern  
355 region (Figures 2, S3 and Table S3). Levels of expected heterozygosity for the MHC locus  
356 between populations ranged from 0.23 to 0.84 (Overall  $H_E=0.79$ , Table S3) and allelic  
357 richness ranged from three to 11 (overall  $AR=7.83$ , Table S3). The northern region showed  
358 lower diversity than the southern region in terms of  $H_E$  and  $AR$ . Two alleles were private to a  
359 single population in the southern region (Raar\_69 and Raar\_65; Figure 2, S2). Three alleles  
360 were only present in the northern region at low frequencies and private to a single population

361 (Raar\_42, Raar\_43, Raar\_68). However, Raar\_42 and Raar\_43 were found in the southern  
362 region in a previous study [33] (Figure 2, S3).

363 The 34 alleles were converted into four different MHC class II exon 2 supertypes based on  
364 physiochemical binding properties (Figure 1). Supertype\_2 was the most common supertype  
365 in the southern region while Supertype\_3 was the most abundant in the northern region  
366 (Figure 1). Supertypes were also grouped by genotypes. Supertype<sub>Haplotype</sub> diversity was  
367 defined as the diversity within each genotype. Supertype<sub>Haplotype</sub> was higher in the southern  
368 region (Supertype<sub>Haplotype\_south</sub>=9; Supertypes<sub>Haplotype\_north</sub>=6). 49% of the southern individuals  
369 carried the Supertype<sub>Haplotype</sub>2\_2 while only 1.18% carried the Supertype<sub>Haplotype</sub>2\_2 in the  
370 north. By contrast, Supertype<sub>Haplotype</sub>3\_3 and Supertype<sub>Haplotype</sub>1\_3 occurred at higher  
371 frequency in the north than in the south (3\_3: 58.1% and 27.2% and 1\_3: 3.53% and 0.88%,  
372 respectively) (Figure 2; S3).

### 373 *Skin bacterial diversity patterns in relation to environmental variables, regions, and sex*

374 We found significant differences between bacterial community composition in the water  
375 filters and on the skin of the amphibians (PERMANOVA;  $p < 0.05$ , PERMDISP);  $p < 0.05$ ; See  
376 Figure S4, Table S4). Alpha-diversity was similar for both sexes (Wilcoxon Observed;  $W =$   
377 3486,  $p = 0.33$ ; Wilcoxon Shannon;  $W = 3453$ ,  $p = 0.3947$ ; Wilcoxon PD;  $W = 3469$ ,  $p =$   
378 0.36) and regions (Wilcoxon Observed;  $W = 2901.5$ ,  $p = 0.8895$ ; Wilcoxon Shannon;  $W =$   
379 2954,  $p = 0.9663$ ; Wilcoxon PD;  $W = 2959$ ,  $p = 0.95$ ; See Figure S5). Average temperature  
380 (PreMean) and Temperature at data collection (TemCollection) and for “Region” were  
381 positively related to alpha-diversity (See Table S5). When we controlled by population, the  
382 average precipitation (PreMean) was significantly different depending on the region,  
383 indicating high heterogeneity in alpha diversity with precipitation and differed by origin.  
384 However, we did not observe significant effects of the average temperature or the temperature  
385 at collection time (TemCollection) on the skin microbiota diversity on GLMMs models  
386 (Table S5). Additionally, we found support for a regional effect in Beta-diversity, showing  
387 significant differences in bacterial community composition between the two regions  
388 (PERMANOVA;  $p < 0.05$  weighted and unweighted UniFrac distances, Figure 3; S6 and Table  
389 S6) but not differences in group dispersions (PERMDISP;  $p > 0.05$ , see Figure S7, and Table  
390 S7).

### 391 **Effects of MHC class II heterozygosity and Skin microbiota composition**

392 At the population level, populations with higher MHC heterozygosity exhibited more diverse  
393 microbiota according to the multiple regression analyses (See Table S8 and Figure S8).  
394 However, individuals with more divergent MHC sequences based on the nucleotide diversity  
395 had less diverse microbiota (Figure S8, Table S8). Given these results, we infer that protein  
396 structure dissimilarity among MHC sequences within a host reduces the diversity of skin  
397 microbial communities based on the nucleotide diversity values. Nucleotide diversity is  
398 directly correlated to the *Theta k* value, which is a proxy of MHC sequence dissimilarity.  
399 Table S3 show that *theta k* (k) values clearly differ between populations and regions, being  
400 lower at northern region where MHC sequences are more similar one to each other (See  
401 Figure S9, Table S8).

402 We next quantified the relationship between individuals that carried MHC alleles grouped  
403 within the same supertype cluster “homozygous” and individuals that carried MHC class II  
404 alleles. The alleles were grouped in different supertype clusters “heterozygous” individuals in  
405 respect to the overall diversity. We grouped all the “homozygous” and “heterozygous”  
406 individuals according to their supertype clustering information. Using GLM models, we found  
407 that “DistinctS” individuals from the north showed a significantly higher microbial diversity  
408 in comparison to southern “DistinctS” individuals (Figure S10 and Table S9). However, we  
409 did not observe such effect on the “SameS” individuals, suggesting a potential bacterial  
410 diversity compensation for the deficiency of MHC diversity in the northern region. We did  
411 not find significant differences in bacterial diversity between specific MHC genotypes present  
412 in both regions (Supertype 2\_3 and Supertype 3\_3). Furthermore, RDA and PERMANOVA  
413 analyses did not show beta bacterial diversity patterns between “DistinctS” individual group  
414 (MHC class II alleles grouped in different Supertypes) and “SameS” individuals group (MHC  
415 class II alleles grouped in the same Supertype). However, our data show significant  
416 differences in community structure among specific supertype-haplotypes (See Table S10).  
417 Additionally, we found that individuals carrying supertypes 1 or 2 had a specific bacterial  
418 composition (See Figure 3B and 3C; Figure S10 and Table S11). Individuals carrying  
419 Supertype haplotype 1\_3, 2\_2, 2\_4 or 3\_3 present a specific bacterial composition (See Table  
420 S12). Both these results might be explained as a strong direct regional effect between north  
421 and south as well as an effect of a specific combination of MHC class II exon 2 on the  
422 microbial structure (Figure S11).

#### 423 **Associations between MHC supertypes and microbial taxa**

424 We did not find bacterial ASVs that were significantly different in abundance between  
425 “*SameS*” and “*DistincS*” individuals according to the MHC supertype clustering. On the  
426 contrary, we found bacterial ASVs that were significant in abundance per supertype (See  
427 Table S13 S14; Figure S12). *Oxalobacteraceae* family was the most common taxa found by  
428 using both DESeq2 and ANCOMBC2. Likewise, the heatmap (Figure 4B) illustrated positive  
429 and negative correlations (spearman rank correlation  $p < 0.05$ ) between superotypes and specific  
430 ASVs. Families exhibiting significant MHC effects (*Comamonadaceae*, *Oxalobacteraceae*  
431 and *Pseudomonadaceae*) are taxonomically clustered (Figure 4A). Supertype 4 affects the  
432 abundance of one single family of *Bacteroidetes*, whereas superotypes 1, 2 and 3 affect the  
433 abundance of at least two *Proteobacteria* families. Surprisingly, Superotypes 2 and 3 which are  
434 the most dominant superotypes in the southern and northern regions, respectively, show an  
435 antagonistic association in specific bacterial taxa, especially *Oxalobacteraceae*.

## 436 Discussion

437 We characterized the skin microbiota composition and MHC Class II exon 2 diversity in 12 *R.*  
438 *arvalis* populations from two separate geographical regions representing different  
439 evolutionary histories due to different post-glacial colonization histories. We also assessed the  
440 relationships between MHC genotype and microbial community diversity to investigate  
441 potential associations between the host MHC genes and skin microbiome and to elucidate  
442 differences between regions and evolutionary histories. Our results indicate that the skin  
443 microbial community of frog populations varies substantially among populations and regions.  
444 The climatic and pond environmental factors appeared to influence the diversity and structure  
445 of microbial communities, but most of the differences identified could not be explained by  
446 environmental factors in our study. Therefore, influence of the microbial community structure  
447 could be related to the host genetic variation, although our data cannot prove such  
448 relationship. Further investigation should be carried out in this regards. Four main results can  
449 be derived from our analyses. First, alpha diversity was similar between regions while beta  
450 diversity, which is related to microbial composition, was significantly different between the  
451 regions. Second, within populations, MHC heterozygosity was positively correlated with  
452 microbial alpha diversity. Third, heterozygous individuals from the north showed higher alpha  
453 diversity compared to the heterozygous individuals from the southern region, where MHC  
454 class II diversity was higher. Fourth, there were indications of antagonistic associations  
455 between MHC class II alleles and specific bacterial taxa at the regional level. We will discuss  
456 each of these results in detail below.

## 457 **Microbiome variation between regions and populations**

458 Previous studies have shown that genetic distribution of MHC class II alleles was strongly  
459 influenced by evolutionary processes such as migration, drift, selection, and demography in  
460 amphibians (Cortázar-Chinarro et al., 2017; Luquet et al., 2019). However, very little is  
461 known about how evolutionary processes influence skin microbiota diversity in amphibians  
462 (Belasen et al., 2021; Torres-Sánchez & Longo, 2022). Despite that our results suggested a  
463 similar pattern of alpha diversity between regions and populations, the relative abundance of  
464 shared ASVs, beta diversity and, thereby, the bacterial community structure composition  
465 varied between regions and populations. Regions and populations had distinct skin microbial  
466 communities, likely reflecting differential environmental and host-specific filtering, where  
467 historical genetic background of different colonizing lineages as well selective pressures may  
468 have an important role of host-microbiome biodiversity distribution. The effect of the genetic  
469 background of the host has been proposed as a stronger predictor of skin microbiome  
470 structure in other systems (Amato et al., 2016; Dimitriu et al., 2019; Muletz Wolz, Yarwood,  
471 Campbell Grant, Fleischer, & Lips, 2018; Weinstein et al., 2021). Earlier, it was found that  
472 co-occurring Panamanian frog species host unique skin bacterial communities (Belden et al.,  
473 2015). Despite this, it is unknown if host-associated traits, such as the immune genes, select  
474 for specific host bacterial communities in amphibians, as it does in other organismal groups  
475 such as humans (Shafquat, Joice, Simmons, & Huttenhower, 2014; Wein & Sorek, 2022).  
476 However, we cannot rule out the possibility that such host-pathogen associations might also  
477 be driven by linkage with other genes.

## 478 **Deterministic factors contributing to microbiome variation**

479 Adaptive immune genes such as MHC have extensively been linked to the susceptibility to  
480 infections in vertebrates (Savage, Muletz-Wolz, Campbell Grant, Fleischer, & Mulder, 2019;  
481 Savage & Zamudio, 2011). Parasite-specific immune responses driven by MHC  
482 polymorphism have been studied to a great extent (Eizaguirre & Lenz, 2010; Elbers & Taylor,  
483 2016; Minias, Whittingham, & Dunn, 2017; Peng, Ballare, Hollis Woodard, den Haan, &  
484 Bolnick, 2021). However, how the complex relationship between MHC and a multitude of  
485 host-associated microbes influence the host immune response is still poorly understood.  
486 While mammalian studies have highlighted that host genetic background can influence  
487 microbial communities via the immune system (Blekhman et al., 2015; Tabrett & Horton,  
488 2020; Woodhams et al., 2020), less is known for other taxa. However, recent investigations  
489 have shed light on important associations between host immunity and microbiomes (Bolnick



490 et al., 2014; Fleischer, Risely, Hoeck, Keller, & Sommer, 2020; Hernández-Gómez et al.,  
491 2018), not only for MHC genes themselves, but also for other immune and cell signaling  
492 genes linked to MHC Class I and II (Flajnik, 2018; Grogan et al., 2018; Richmond, Savage,  
493 Zamudio, & Rosenblum, 2009). In sticklebacks, high MHC variation has been associated with  
494 a diverse microbiota (Bolnick et al., 2014), while in amphibians high MHC variability may  
495 influence host health indirectly by shaping bacterial communities (Belasen et al., 2021). In  
496 concordance to previous findings in *R. arvalis* (Cortázar-Chinarro et al., 2017), we found  
497 lower MHC class II diversity at northern latitudes, conferring a possible increase in  
498 susceptibility to infection. However, we did not find regional differences at bacterial alpha  
499 diversity, but at the microbial community composition.

500 We found a positive link between expected MHC heterozygosity and bacterial alpha diversity.  
501 These results are in line with the heterozygote advantage (overdominance) theory where  
502 heterozygous individuals might successfully carry a highly diverse bacterial community on  
503 the skin and consequently heighten resistance to infection (Khan et al., 2019). Additionally,  
504 we found that more divergent MHC alleles are negatively associated to alpha diversity and  
505 heterozygous individuals from the northern populations carry a more diverse bacterial  
506 community as compared to individuals from the southern populations. This result suggests  
507 that lower genetic variation commonly observed at northern latitudes could be compensated  
508 by higher bacterial richness at northern populations, showing support to the idea that more  
509 diverse bacterial communities will compensate for the lower individual MHC diversity at  
510 northern latitudes.

511 Studies on chimpanzees have shown a straightforward relationship between a healthy and  
512 diverse immune system and the gut microbiome composition and the direct role on its body  
513 internal regulation (Barbian et al., 2018; Björk, Dasari, Grieneisen, & Archie, 2019).  
514 Consequently, individuals suffering immunodeficiency due to a pathogenic infection  
515 experience substantial alterations of their gut microbiota communities (Dillon et al., 2014;  
516 Moeller et al., 2015), confirming that microbes shape immune responses (Salas & Chang,  
517 2014). In humans, patients with a poor immune system show higher gut bacterial diversity  
518 and higher frequency of low genetic diversity genes than patients with a regular immune  
519 system in terms of diversity (Bosák et al., 2021). Most of the studies have focused on gut  
520 microbiome and its direct association with the mammalian immune system and very little has  
521 been done on other bacterial communities (incl. skin microbiota) and other host vertebrate  
522 groups. Therefore, experimental studies investigating the role of skin microbiome diversity in

523 shaping immune response are urgently needed in order to gain a better understanding of the  
524 factors causing the bacterial community compensation effect on the host.

525 We hypothesized that host MHC haplotypes would selectively target specific bacterial  
526 communities, co-evolving in a manner that increases host survival in the face of pathogenic  
527 infections. To this extent, no infection data exist to fully test this hypothesis and further  
528 investigations in this regard are needed. However, one of our main results of this study  
529 indicates that individuals carrying supertype<sub>haplotype</sub> 1\_3, 2\_2, 2\_4 and 3\_3 have a specific  
530 bacterial composition. Besides, supertype 2 and 3, the most abundant superotypes in south and  
531 north, respectively, are antagonistically linked to specific bacterial taxa. For instance,  
532 taxonomic units ASV52, ASV73 and ASV71 that are included within the proteobacteria  
533 group that are from the Oxalobacteraceae family, are positively correlated with Supertype 3  
534 but negatively correlated with Supertype 2. Bacteria from family Oxalobacteraceae have been  
535 recently detected in amphibian skin among individuals with different Bd infection intensity  
536 rates in amphibian (Ellison, Knapp, Sparagon, Swei, & Vredenburg, 2019). This result might  
537 indicate a different strategy to combat infectious diseases between regions. We suggest that  
538 specific bacteria from Oxalobacteraceae family could act differently on infected individuals  
539 depending of their MHC class II supertype configuration and bacterial abundance, but this  
540 deserves further investigation.

541 Together, these findings suggest that the evolutionary associations between host and  
542 microbiota is a complex evolutionary process modulated by distinct historical processes, local  
543 environmental conditions, and genetic characteristics of the host. Several studies support the  
544 idea that local environmental conditions might directly predict the amphibian skin  
545 microbiome structure by influencing the pool of potential symbionts in the habitat (Amato et  
546 al., 2016; Kueneman et al., 2014; Rebollar et al., 2016), but none of them considered the  
547 evolutionary history of populations, and how drift, local adaptation, and gene flow affect the  
548 host genome and how this affects microbiome composition. Therefore, our study shows that a  
549 combination of 1) evolutionary and biogeographic processes, 2) local environmental  
550 conditions and 3) host genome characteristics, may contribute to shape the skin microbiota  
551 diversity and heterogeneity. The study of these factors is essential for understanding host-  
552 microbiome-immunity interactions. Further surveying of wild populations along  
553 environmental gradients may help to identify environmental characteristics and evolutionary  
554 processes that shape host-associated microbial communities.

555 **References**

- 556 Amato, K. R., Martinez-Mota, R., Righini, N., Raguet-Schofield, M., Corcione, F. P., Marini,  
557 E., . . . Lovelace, E. (2016). Phylogenetic and ecological factors impact the gut  
558 microbiota of two Neotropical primate species. *Oecologia*, *180*(3), 717-733.
- 559 Antwis, R. E., Fry, E., James, C. E., & Ferry, N. (2020). Microbial biotechnology. In  
560 *Microbiomes of soils, plants and animals: an integrated approach* (pp. 182-221):  
561 Cambridge University Press.
- 562 Barbian, H. J., Li, Y., Ramirez, M., Klase, Z., Lipende, I., Mjungu, D., . . . Lonsdorf, E. V.  
563 (2018). Destabilization of the gut microbiome marks the end-stage of simian  
564 immunodeficiency virus infection in wild chimpanzees. *American journal of*  
565 *primatology*, *80*(1), e22515.
- 566 Bates, K. A., Clare, F. C., O'Hanlon, S., Bosch, J., Brookes, L., Hopkins, K., . . . Fisher, M.  
567 C. (2018). Amphibian chytridiomycosis outbreak dynamics are linked with host skin  
568 bacterial community structure. *Nature communications*, *9*(1), 1-11.
- 569 Belasen, A. M., Riolo, M. A., Bletz, M. C., Lyra, M. L., Toledo, L. F., & James, T. Y. (2021).  
570 Geography, Host Genetics, and Cross-Domain Microbial Networks Structure the  
571 Skin Microbiota of Fragmented Brazilian Atlantic Forest Frog Populations. *Ecology*  
572 *and Evolution*, *11*(14), 9293-9307.
- 573 Belden, L. K., Hughey, M. C., Rebollar, E. A., Umile, T. P., Loftus, S. C., Burzynski, E. A., .  
574 . . . Becker, M. H. (2015). Panamanian frog species host unique skin bacterial  
575 communities. *Frontiers in microbiology*, *6*, 1171.
- 576 Björk, J. R., Dasari, M., Grieneisen, L., & Archie, E. A. (2019). Primate microbiomes over  
577 time: longitudinal answers to standing questions in microbiome research. *American*  
578 *journal of primatology*, *81*(10-11), e22970.
- 579 Blekhnman, R., Goodrich, J. K., Huang, K., Sun, Q., Bukowski, R., Bell, J. T., . . . Gevers, D.  
580 (2015). Host genetic variation impacts microbiome composition across human body  
581 sites. *Genome biology*, *16*(1), 1-12.
- 582 Bolnick, D. I., Snowberg, L. K., Caporaso, J. G., Lauber, C., Knight, R., & Stutz, W. E.  
583 (2014). Major H istocompatibility C omplex class II b polymorphism influences gut  
584 microbiota composition and diversity. *Molecular Ecology*, *23*(19), 4831-4845.
- 585 Bonder, M. J., Kurilshikov, A., Tigchelaar, E. F., Mujagic, Z., Imhann, F., Vila, A. V., . . .  
586 Smeekens, S. P. (2016). The effect of host genetics on the gut microbiome. *Nature*  
587 *genetics*, *48*(11), 1407-1412.
- 588 Bosák, J., Lexa, M., Fiedorová, K., Gadara, D. C., Micenková, L., Spacil, Z., . . . Šmajš, D.  
589 (2021). Patients with common variable immunodeficiency (CVID) show higher gut

- 590 bacterial diversity and levels of low-abundance genes than the healthy housemates.  
591 *Frontiers in immunology*, *12*, 671239.
- 592 Callahan, B. J., McMurdie, P. J., Rosen, M. J., Han, A. W., Johnson, A. J. A., & Holmes, S.  
593 P. (2016). DADA2: High-resolution sample inference from Illumina amplicon data.  
594 *Nature methods*, *13*(7), 581-583.
- 595 Cameron, E. S., Schmidt, P. J., Tremblay, B. J.-M., Emelko, M. B., & Müller, K. M. (2020).  
596 To rarefy or not to rarefy: Enhancing diversity analysis of microbial communities  
597 through next-generation sequencing and rarefying repeatedly. *BioRxiv*, 2020.2009.  
598 2009.290049.
- 599 Cortázar-Chinarro, M., Lattenkamp, E. Z., Meyer-Lucht, Y., Luquet, E., Laurila, A., &  
600 Höglund, J. (2017). Drift, selection, or migration? Processes affecting genetic  
601 differentiation and variation along a latitudinal gradient in an amphibian. *BMC*  
602 *evolutionary biology*, *17*(1), 1-14.
- 603 Cortazar-Chinarro, M., Meyer-Lucht, Y., Laurila, A., & Höglund, J. (2018). Signatures of  
604 historical selection on MHC reveal different selection patterns in the moor frog (*Rana*  
605 *arvalis*). *Immunogenetics*, *70*(7), 477-484.
- 606 Costa, D., Tavares, R. M., Baptista, P., & Lino-Neto, T. (2022). The influence of bioclimate  
607 on soil microbial communities of cork oak. *BMC microbiology*, *22*(1), 1-17.
- 608 Couch, C. E., Stagaman, K., Spaan, R. S., Combrink, H. J., Sharpton, T. J., Beechler, B. R., &  
609 Jolles, A. E. (2021). Diet and gut microbiome enterotype are associated at the  
610 population level in African buffalo. *Nature communications*, *12*(1), 1-11.
- 611 Cullen, C. M., Aneja, K. K., Beyhan, S., Cho, C. E., Woloszynek, S., Convertino, M., . . .  
612 Alvarez-Ponce, D. (2020). Emerging priorities for microbiome research. *Frontiers in*  
613 *microbiology*, *11*, 136.
- 614 Darolová, A., Poláček, M., Křištofík, J., Lukasch, B., & Hoi, H. (2021). First Evidence of a  
615 Relationship Between Female Major Histocompatibility Complex Diversity and  
616 Eggshell Bacteria in House Sparrows (*Passer domesticus*). *Frontiers in Ecology and*  
617 *Evolution*, *9*, 615667.
- 618 Dillon, S., Lee, E., Kotter, C., Austin, G., Dong, Z., Hecht, D., . . . Landay, A. (2014). An  
619 altered intestinal mucosal microbiome in HIV-1 infection is associated with mucosal  
620 and systemic immune activation and endotoxemia. *Mucosal immunology*, *7*(4), 983-  
621 994.

- 622 Dimitriu, P. A., Iker, B., Malik, K., Leung, H., Mohn, W., & Hillebrand, G. G. (2019). New  
623 insights into the intrinsic and extrinsic factors that shape the human skin microbiome.  
624 *MBio*, *10*(4), e00839-00819.
- 625 Eizaguirre, C., & Lenz, T. (2010). Major histocompatibility complex polymorphism:  
626 dynamics and consequences of parasite-mediated local adaptation in fishes. *Journal*  
627 *of fish biology*, *77*(9), 2023-2047.
- 628 Elbers, J. P., & Taylor, S. S. (2016). Major histocompatibility complex polymorphism in  
629 reptile conservation. *Herpetol Conserv Biol*, *11*, 1-12.
- 630 Ellison, S., Knapp, R. A., Sparagon, W., Swei, A., & Vredenburg, V. T. (2019). Reduced skin  
631 bacterial diversity correlates with increased pathogen infection intensity in an  
632 endangered amphibian host. *Molecular ecology*, *28*(1), 127-140.
- 633 Excoffier, L., & Lischer, H. E. (2010). Arlequin suite ver 3.5: a new series of programs to  
634 perform population genetics analyses under Linux and Windows. *Molecular Ecology*  
635 *Resources*, *10*(3), 564-567.
- 636 Fisher, M. C., Henk, D., Briggs, C. J., Brownstein, J. S., Madoff, L. C., McCraw, S. L., &  
637 Gurr, S. J. (2012). Emerging fungal threats to animal, plant and ecosystem health.  
638 *Nature*, *484*(7393), 186-194.
- 639 Flajnik, M. F. (2018). A cold-blooded view of adaptive immunity. *Nature Reviews*  
640 *Immunology*, *18*(7), 438-453.
- 641 Flajnik, M. F., & Kasahara, M. (2001). Comparative genomics of the MHC: glimpses into the  
642 evolution of the adaptive immune system. *Immunity*, *15*(3), 351-362.
- 643 Fleischer, R., Risely, A., Hoeck, P. E., Keller, L. F., & Sommer, S. (2020). Mechanisms  
644 governing avian phyllosymbiosis: Genetic dissimilarity based on neutral and MHC  
645 regions exhibits little relationship with gut microbiome distributions of Galápagos  
646 mockingbirds. *Ecology and evolution*, *10*(23), 13345-13354.
- 647 Foster, K. R., Schluter, J., Coyte, K. Z., & Rakoff-Nahoum, S. (2017). The evolution of the  
648 host microbiome as an ecosystem on a leash. *Nature*, *548*(7665), 43-51.
- 649 Garud, N. R., & Pollard, K. S. (2020). Population genetics in the human microbiome. *Trends*  
650 *in Genetics*, *36*(1), 53-67.
- 651 Goslee, S. C., & Urban, D. L. (2007). The ecodist package for dissimilarity-based analysis of  
652 ecological data. *Journal of Statistical Software*, *22*, 1-19.
- 653 Goudet, J. (1995). FSTAT (version 1.2): a computer program to calculate F-statistics. *Journal*  
654 *of heredity*, *86*(6), 485-486.

- 655 Grogan, L. F., Robert, J., Berger, L., Skerratt, L. F., Scheele, B. C., Castley, J. G., . . .  
656 McCallum, H. I. (2018). Review of the amphibian immune response to  
657 chytridiomycosis, and future directions. *Frontiers in immunology*, *9*, 2536.
- 658 Groussin, M., Mazel, F., & Alm, E. J. (2020). Co-evolution and co-speciation of host-gut  
659 bacteria systems. *Cell Host & Microbe*, *28*(1), 12-22.
- 660 Gu, Z., Gu, L., Eils, R., Schlesner, M., & Brors, B. (2014). Circlize implements and enhances  
661 circular visualization in R. *Bioinformatics*, *30*(19), 2811-2812.
- 662 Henry, L. P., Bruijning, M., Forsberg, S. K., & Ayroles, J. F. (2021). The microbiome extends  
663 host evolutionary potential. *Nature communications*, *12*(1), 1-13.
- 664 Hernández-Gómez, O., Briggler, J. T., & Williams, R. N. (2018). Influence of  
665 immunogenetics, sex and body condition on the cutaneous microbial communities of  
666 two giant salamanders. *Molecular ecology*, *27*(8), 1915-1929.
- 667 Hooper, L. V., Littman, D. R., & Macpherson, A. J. (2012). Interactions between the  
668 microbiota and the immune system. *science*, *336*(6086), 1268-1273.
- 669 Jiménez, R. R., & Sommer, S. (2017). The amphibian microbiome: natural range of variation,  
670 pathogenic dysbiosis, and role in conservation. *Biodiversity and conservation*, *26*(4),  
671 763-786.
- 672 Jombart, T., Devillard, S., & Balloux, F. (2010). Discriminant analysis of principal  
673 components: a new method for the analysis of genetically structured populations.  
674 *BMC genetics*, *11*(1), 1-15.
- 675 Kaufman, J. (2020). From chickens to humans: the importance of peptide repertoires for  
676 MHC class I alleles. *Frontiers in immunology*, *11*, 601089.
- 677 Kembel, S. W., & Kembel, M. S. W. (2014). Package ‘picante’. *R Foundation for Statistical*  
678 *Computing, Vienna, Austria: [https://cran.](https://cran.r-project.org/web/packages/picante/picante.pdf) r-project.*  
679 *org/web/packages/picante/picante.pdf.[Google Scholar]*.
- 680 Khan, A. A., Yurkovetskiy, L., O’Grady, K., Pickard, J. M., de Pooter, R., Antonopoulos, D.  
681 A., . . . Chervonsky, A. (2019). Polymorphic immune mechanisms regulate  
682 commensal repertoire. *Cell reports*, *29*(3), 541-550. e544.
- 683 Kilpatrick, A. M., Briggs, C. J., & Daszak, P. (2010). The ecology and impact of  
684 chytridiomycosis: an emerging disease of amphibians. *Trends in ecology & evolution*,  
685 *25*(2), 109-118.
- 686 Knopp, T., & Merilä, J. (2009). The postglacial recolonization of Northern Europe by *Rana*  
687 *arvalis* as revealed by microsatellite and mitochondrial DNA analyses. *Heredity*,  
688 *102*(2), 174-181.

- 689 Kubinak, J. L., Stephens, W. Z., Soto, R., Petersen, C., Chiaro, T., Gogokhia, L., . . .  
690 Morrison, L. (2015). MHC variation sculpts individualized microbial communities  
691 that control susceptibility to enteric infection. *Nature communications*, 6(1), 1-13.
- 692 Kueneman, J. G., Parfrey, L. W., Woodhams, D. C., Archer, H. M., Knight, R., & McKenzie,  
693 V. J. (2014). The amphibian skin-associated microbiome across species, space and  
694 life history stages. *Molecular ecology*, 23(6), 1238-1250.
- 695 Kumar, S., Stecher, G., Li, M., Knyaz, C., & Tamura, K. (2018). MEGA X: molecular  
696 evolutionary genetics analysis across computing platforms. *Molecular biology and  
697 evolution*, 35(6), 1547.
- 698 Leclaire, S., Strandh, M., Dell'Arciccia, G., Gabirot, M., Westerdahl, H., & Bonadonna, F.  
699 (2019). Plumage microbiota covaries with the major histocompatibility complex in  
700 blue petrels. *Molecular ecology*, 28(4), 833-846.
- 701 Lee, Y. K., & Mazmanian, S. K. (2010). Has the microbiota played a critical role in the  
702 evolution of the adaptive immune system? *science*, 330(6012), 1768-1773.
- 703 Lighten, J., Van Oosterhout, C., Paterson, I. G., McMullan, M., & Bentzen, P. (2014).  
704 Ultra-deep Illumina sequencing accurately identifies MHC class II b alleles and  
705 provides evidence for copy number variation in the guppy (*Poecilia reticulata*).  
706 *Molecular Ecology Resources*, 14(4), 753-767.
- 707 Lin, H., Peddada, S. D., & Lin, M. H. (2021). Package 'ANCOMBC'.
- 708 Lin, P., Bach, M., Asquith, M., Lee, A. Y., Akileswaran, L., Stauffer, P., . . . Dorris, M.  
709 (2014). HLA-B27 and human  $\beta$ 2-microglobulin affect the gut microbiota of transgenic  
710 rats. *PloS one*, 9(8), e105684.
- 711 Love, M., Anders, S., & Huber, W. (2014). Differential analysis of count data—the DESeq2  
712 package. *Genome Biol*, 15(550), 10-1186.
- 713 Luquet, E., Rödin Mörch, P., Cortázar-Chinarro, M., Meyer-Lucht, Y., Höglund, J., &  
714 Laurila, A. (2019). Post-glacial colonization routes coincide with a life-history  
715 breakpoint along a latitudinal gradient. *Journal of evolutionary biology*, 32(4), 356-  
716 368.
- 717 Magoč, T., & Salzberg, S. L. (2011). FLASH: fast length adjustment of short reads to  
718 improve genome assemblies. *Bioinformatics*, 27(21), 2957-2963.
- 719 Martel, A., Blooi, M., Adriaensen, C., Van Rooij, P., Beukema, W., Fisher, M. C., . . . Goka,  
720 K. (2014). Recent introduction of a chytrid fungus endangers Western Palearctic  
721 salamanders. *Science*, 346(6209), 630-631.

- 722 McMurdie, P. J., & Holmes, S. (2013). phyloseq: an R package for reproducible interactive  
723 analysis and graphics of microbiome census data. *PloS one*, 8(4), e61217.
- 724 McMurdie, P. J., & Holmes, S. (2014). Waste not, want not: why rarefying microbiome data  
725 is inadmissible. *PLoS computational biology*, 10(4), e1003531.
- 726 Minias, P., Whittingham, L. A., & Dunn, P. O. (2017). Coloniality and migration are related  
727 to selection on MHC genes in birds. *Evolution*, 71(2), 432-441.
- 728 Moeller, A. H., Peeters, M., Ayoub, A., Ngole, E. M., Esteban, A., Hahn, B. H., & Ochman,  
729 H. (2015). Stability of the gorilla microbiome despite simian immunodeficiency virus  
730 infection. *Molecular ecology*, 24(3), 690-697.
- 731 Montero, B. K., Schwensow, N., Gillingham, M. A., Ratovonamana, Y. R., Rakotondranary,  
732 S. J., Corman, V., . . . Sommer, S. (2021). Evidence of MHC class I and II influencing  
733 viral and helminth infection via the microbiome in a non-human primate. *PLoS*  
734 *Pathogens*, 17(11), e1009675.
- 735 Muletz Wolz, C. R., Yarwood, S. A., Campbell Grant, E. H., Fleischer, R. C., & Lips, K. R.  
736 (2018). Effects of host species and environment on the skin microbiome of  
737 Plethodontid salamanders. *Journal of Animal Ecology*, 87(2), 341-353.
- 738 Müller, D. B., Vogel, C., Bai, Y., & Vorholt, J. A. (2016). The plant microbiota: systems-  
739 level insights and perspectives. *Annu. Rev. Genet*, 50(1), 211-234.
- 740 Ohta, Y., Okamura, K., McKinney, E. C., Bartl, S., Hashimoto, K., & Flajnik, M. F. (2000).  
741 Primitive synteny of vertebrate major histocompatibility complex class I and class II  
742 genes. *Proceedings of the National Academy of Sciences*, 97(9), 4712-4717.
- 743 Oksanen, J., Blanchet, F., Friendly, M., Kindt, R., Legendre, P., Mcglinn, D., . . . Solymos, P.  
744 (2019). Vegan: community ecology package. Ordination methods, diversity analysis  
745 and other functions for community and vegetation ecologists, 05–26. Version 2.5-1.  
746 In.
- 747 Olivares, M., Neef, A., Castillejo, G., De Palma, G., Varea, V., Capilla, A., . . . Polanco, I.  
748 (2015). The HLA-DQ2 genotype selects for early intestinal microbiota composition in  
749 infants at high risk of developing coeliac disease. *Gut*, 64(3), 406-417.
- 750 Peng, F., Ballare, K. M., Hollis Woodard, S., den Haan, S., & Bolnick, D. I. (2021). What  
751 evolutionary processes maintain MHC II diversity within and among populations of  
752 stickleback? *Molecular ecology*, 30(7), 1659-1671.
- 753 Rebollar, E. A., Hughey, M. C., Medina, D., Harris, R. N., Ibáñez, R., & Belden, L. K.  
754 (2016). Skin bacterial diversity of Panamanian frogs is associated with host



- 755 susceptibility and presence of *Batrachochytrium dendrobatidis*. *The ISME journal*,  
756 *10*(7), 1682-1695.
- 757 Richmond, J. Q., Savage, A. E., Zamudio, K. R., & Rosenblum, E. B. (2009). Toward  
758 immunogenetic studies of amphibian chytridiomycosis: linking innate and acquired  
759 immunity. *Bioscience*, *59*(4), 311-320.
- 760 Rock, K. L., Reits, E., & Neefjes, J. (2016). Present yourself! By MHC class I and MHC class  
761 II molecules. *Trends in immunology*, *37*(11), 724-737.
- 762 Rödin-Mörch, P., Luquet, E., Meyer-Lucht, Y., Richter-Boix, A., Höglund, J., & Laurila,  
763 A. (2019). Latitudinal divergence in a widespread amphibian: Contrasting patterns of  
764 neutral and adaptive genomic variation. *Molecular Ecology*, *28*(12), 2996-3011.
- 765 Salas, J. T., & Chang, T. L. (2014). Microbiome in human immunodeficiency virus infection.  
766 *Clinics in laboratory medicine*, *34*(4), 733-745.
- 767 Savage, A. E., Muletz-Wolz, C. R., Campbell Grant, E. H., Fleischer, R. C., & Mulder, K. P.  
768 (2019). Functional variation at an expressed MHC class II $\beta$  locus associates with  
769 Ranavirus infection intensity in larval anuran populations. *Immunogenetics*, *71*(4),  
770 335-346.
- 771 Savage, A. E., & Zamudio, K. R. (2011). MHC genotypes associate with resistance to a frog-  
772 killing fungus. *Proceedings of the National Academy of Sciences*, *108*(40), 16705-  
773 16710.
- 774 Scheele, B. C., Pasmans, F., Skerratt, L. F., Berger, L., Martel, A., Beukema, W., . . .  
775 Catenazzi, A. (2019). Amphibian fungal panzootic causes catastrophic and ongoing  
776 loss of biodiversity. *Science*, *363*(6434), 1459-1463.
- 777 Sebastian, A., Herdegen, M., Migalska, M., & Radwan, J. (2016). amplisas: A web server for  
778 multilocus genotyping using next-generation amplicon sequencing data. *Molecular*  
779 *Ecology Resources*, *16*(2), 498-510.
- 780 Shafquat, A., Joice, R., Simmons, S. L., & Huttenhower, C. (2014). Functional and  
781 phylogenetic assembly of microbial communities in the human microbiome. *Trends in*  
782 *microbiology*, *22*(5), 261-266.
- 783 Shetty, S. A., & Lahti, L. (2019). Microbiome data science. *Journal of biosciences*, *44*(5), 1-6.
- 784 Tabrett, A., & Horton, M. W. (2020). The influence of host genetics on the microbiome.  
785 *F1000Research*, *9*.
- 786 Team, R. C. (2013). R: A language and environment for statistical computing.
- 787 Thaïss, C. A., Zmora, N., Levy, M., & Elinav, E. (2016). The microbiome and innate  
788 immunity. *Nature*, *535*(7610), 65-74.

- 789 Torres-Sánchez, M., & Longo, A. V. (2022). Linking pathogen–microbiome–host  
790 interactions to explain amphibian population dynamics. *Molecular Ecology*, *31*(22),  
791 5784-5794.
- 792 Tregaskes, C. A., & Kaufman, J. (2021). Chickens as a simple system for scientific discovery:  
793 The example of the MHC. *Molecular immunology*, *135*, 12-20.
- 794 Trevelline, B. K., Fontaine, S. S., Hartup, B. K., & Kohl, K. D. (2019). Conservation biology  
795 needs a microbial renaissance: a call for the consideration of host-associated  
796 microbiota in wildlife management practices. *Proceedings of the Royal Society B*,  
797 *286*(1895), 20182448.
- 798 Varg, J. E., Outomuro, D., Kunce, W., Kuehrer, L., Svanbäck, R., & Johansson, F. (2022).  
799 Microplastic Exposure Across Trophic Levels: Effects on the Host-microbiota of  
800 Freshwater Organisms.
- 801 Wein, T., & Sorek, R. (2022). Bacterial origins of human cell-autonomous innate immune  
802 mechanisms. *Nature Reviews Immunology*, 1-10.
- 803 Weinstein, S. B., Martínez-Mota, R., Stapleton, T. E., Klure, D. M., Greenhalgh, R., Orr, T.  
804 J., . . . Dearing, M. D. (2021). Microbiome stability and structure is governed by host  
805 phylogeny over diet and geography in woodrats (*Neotoma* spp.). *Proceedings of the*  
806 *National Academy of Sciences*, *118*(47), e2108787118.
- 807 West, A. G., Waite, D. W., Deines, P., Bourne, D. G., Digby, A., McKenzie, V. J., & Taylor,  
808 M. W. (2019). The microbiome in threatened species conservation. *Biological*  
809 *Conservation*, *229*, 85-98.
- 810 Wickham, H. (2016). Data analysis. In *ggplot2* (pp. 189-201): Springer.
- 811 Wielstra, B., Sillero, N., Vörös, J., & Arntzen, J. W. (2014). The distribution of the crested  
812 and marbled newt species (*Amphibia*: *Salamandridae*: *Triturus*)—an addition to the  
813 New Atlas of Amphibians and Reptiles of Europe. *Amphibia-Reptilia*, *35*(3), 376-381.
- 814 Willis, A. D. (2019). Rarefaction, alpha diversity, and statistics. *Frontiers in microbiology*,  
815 *10*, 2407.
- 816 Woodhams, D. C., Bletz, M. C., Becker, C. G., Bender, H. A., Buitrago-Rosas, D., Diebboll,  
817 H., . . . Kurosawa, E. (2020). Host-associated microbiomes are predicted by immune  
818 system complexity and climate. *Genome biology*, *21*(1), 1-20.
- 819 Yilmaz, P., Parfrey, L. W., Yarza, P., Gerken, J., Pruesse, E., Quast, C., . . . Glöckner, F. O.  
820 (2014). The SILVA and “all-species living tree project (LTP)” taxonomic frameworks.  
821 *Nucleic acids research*, *42*(D1), D643-D648.

822 Zilber-Rosenberg, I., & Rosenberg, E. (2008). Role of microorganisms in the evolution of  
823 animals and plants: the hologenome theory of evolution. *FEMS microbiology reviews*,  
824 32(5), 723-735.

825

## 826 **Acknowledgements**

827 We thank David Åhlen for the invaluable help in the field. Many thanks to Gunilla Egström  
828 for all the help and support in the lab. We also want to thank Javier Edo Varg for the help  
829 with microbiome pipeline analysis and all the guidance in the lab and to Yvonne Meyer-Lucht  
830 for the invaluable help during the study design.

## 831 **Data accessibility**

832 Electronic supplementary material is available online:

833 <https://figshare.com/s/fa4e49bd4aa8e9f8819b>

834 Raw data available from NCBI: pending

835

## 836 **Authors contribution**

837 MC; conceptualization, field work, lab work, data curation, formal analyses, writing-original  
838 draft, funding; ARB.; field work, conceptualization, formal analyses, writing-original draft,  
839 review and editing, PRM; field work, statistical-bioinformatic support, writing – review and  
840 editing, PH; statistical-bioinformatic support, writing-review and editing; JBL: field work,  
841 writing-review and editing; AL; conceptualization, funding, writing-review and editing, JH;  
842 conceptualization, funding, writing-review and editing.

## 843 **Conflict of interest declaration**

844 We declare we have no competing interests.

## 845 **Funding**

846 Funding for the field work was provided by The Swedish Research Council Formas (grant  
847 146400178 to JH), Stiftelsen Oscar och Lili Lamms Minne (DO2013-0013 to JH) and  
848 Swedish Research Council (621-2013-4503 to AL). Funding for the lab work was provided by

849 Stiftelsen för Zoologisk Forskning to MC, Hiertas Minne foundation (FO2018-0540 to MC)  
850 and Kungliga Vetenskapsakademin to MC (BS2018-0110).

851

852

853

854 **Figures and tables**

855 **Figure 1.** A) A hierarchical clustering tree based on the Peptide binding regions (PBR) of MHC class II exon 2 in *R. arvalis* and the z-descriptors  
856 recovering a total of 34 haplotypes. The black line indicates the optimal number of clusters grouped as supertypes (S1, S2, S3 and S4). The  
857 number of clusters (supertypes) was based on the divergence between the branches in the phylogenetic tree. Alleles within clusters were  
858 collapsed into a single supertype. B) Pie chart representing supertype frequencies in the two regions (Luleå (north) and Uppland (south) marked  
859 with a black dot).

860

861

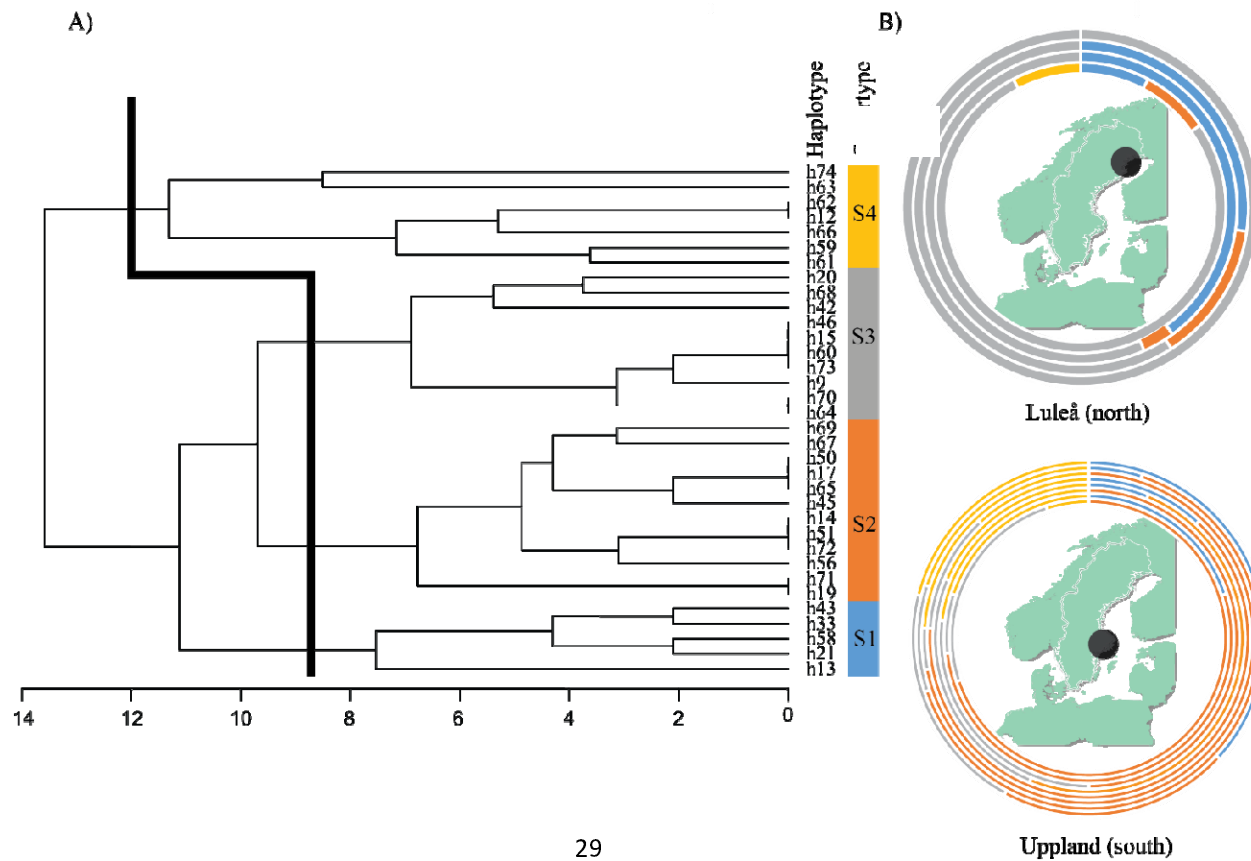

862 **Figure 2.** Allelic frequency distribution of MHC Class II haplotypes and supertype haplotypes in 12 *R.arvalis* populations (P1: Ekeborg, P3:  
863 Eneby, P4: Valsbrunna, P10: Kroklösa, P22: Högbyhatt, P23: Dalkarlskärret, P18: Mosta, P26: Ströbykärret (Uppland), P34: Lillträsket, P35:  
864 Vittjärnen, P36: Djurhustjärnen, P37: Dalbacka (Luleå)). Colour coding scheme for MHC alleles is given in Fig. S2.

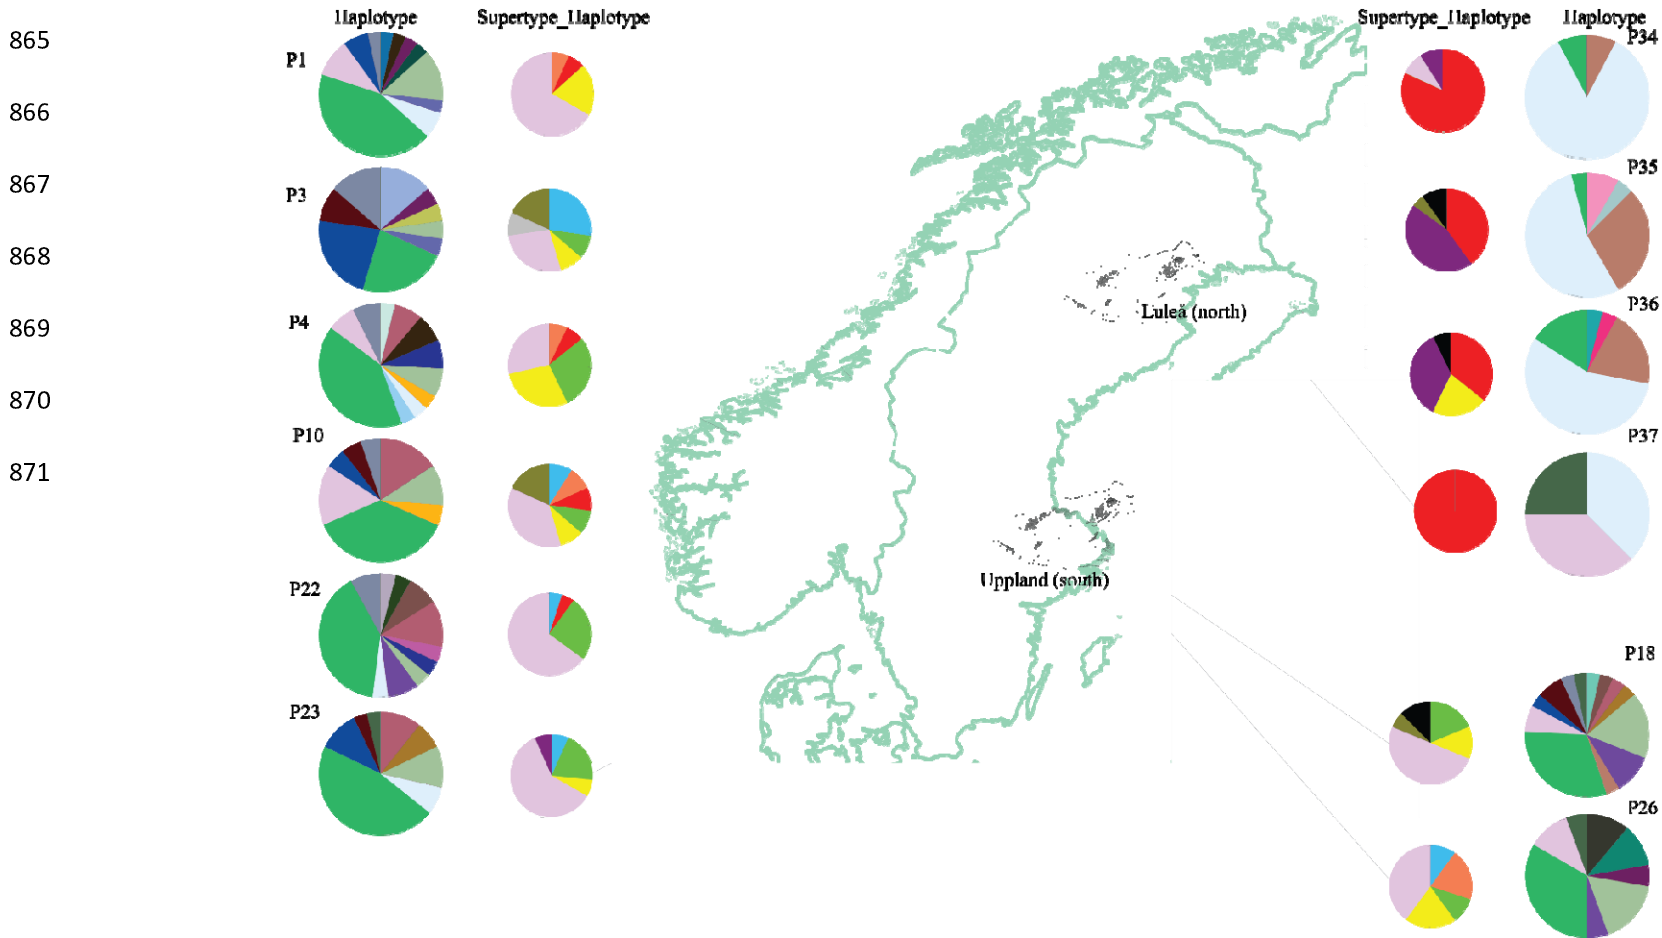

872 **Figure 3. A)** Differences in bacterial community composition of 16S DNA skin microbiota  
873 between regions represented by hierarchal clustering of samples (Ward's clustering; Bray-  
874 Curtis distance). Clusters representing the 16S DNA skin microbiota composition from  
875 Uppland (South) are colored in purple and from Luleå (North) in orange, respectively. **B)**  
876 RDA performed with the bacteria identified in skin microbiome clustered in two main groups  
877 according to the amphibian origin. Each point represents the skin microbial community of an  
878 individual *R. arvalis*. 16S skin samples of an individuals from Uppland are represented in  
879 purple and samples of individuals from Luleå are represented in orange. The supertypes (S1,  
880 S2, S3 and S4) are settled as variables represented with arrows. **C)** The RDA plots show the  
881 separation pattern for every single supertype (S1, S2, S3 and S4). The supertypes that are  
882 represented in plot B and C are highlighted red and labelled in bold and with an increase in  
883 size. Significant supertypes are marked with (\*) with a  $p < 0.05$  according to PERMANOVA,  
884 Adonis test.  
885

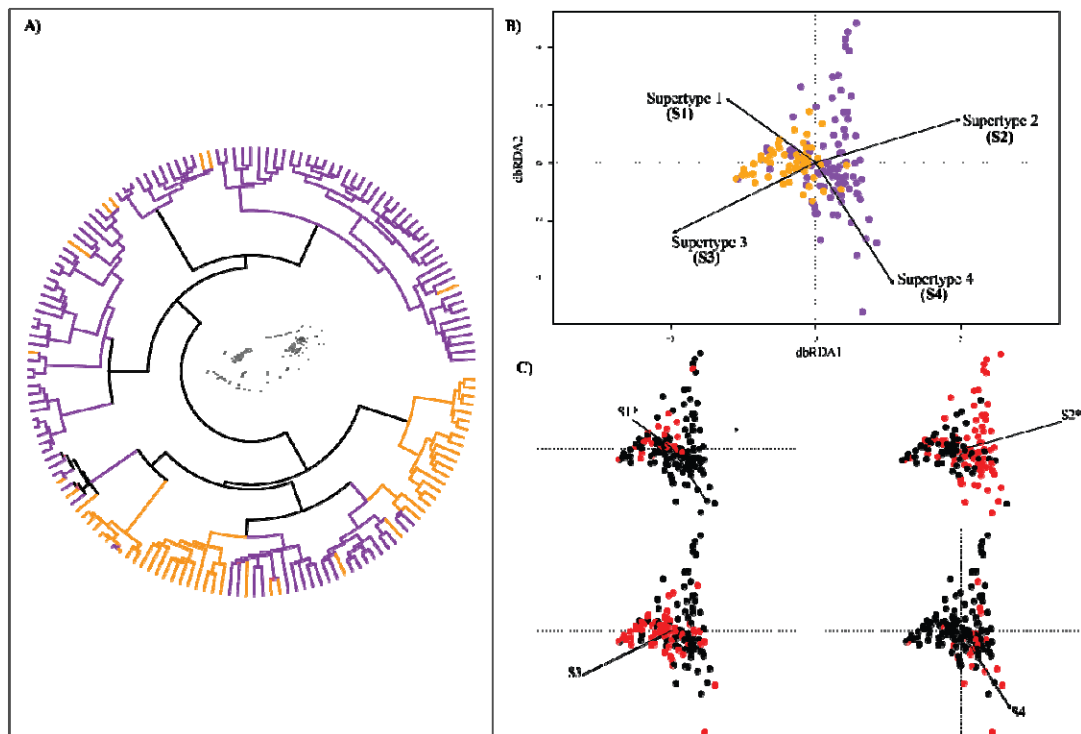

886 **Figure 4. A)** The neighbor-joining tree shows the phylogenetic relationships among ASVs correlated to MHC supertypes at family level.  
 887 *Commamonadaceae* family is colored in dark pink, *Oxalobacteraceae* is colored in light green and bacteria belonging to the *Burkholderiaceae*  
 888 family are colored in light blue. **B)** Heatmap showing the correlations between supertypes and specific ASVs. Significant spearman cross-  
 889 correlations ( $p < 0.05$ ) are labeled with (+) or (-). Positive correlations are shown in dark yellow (+) and negative correlations (-) in dark

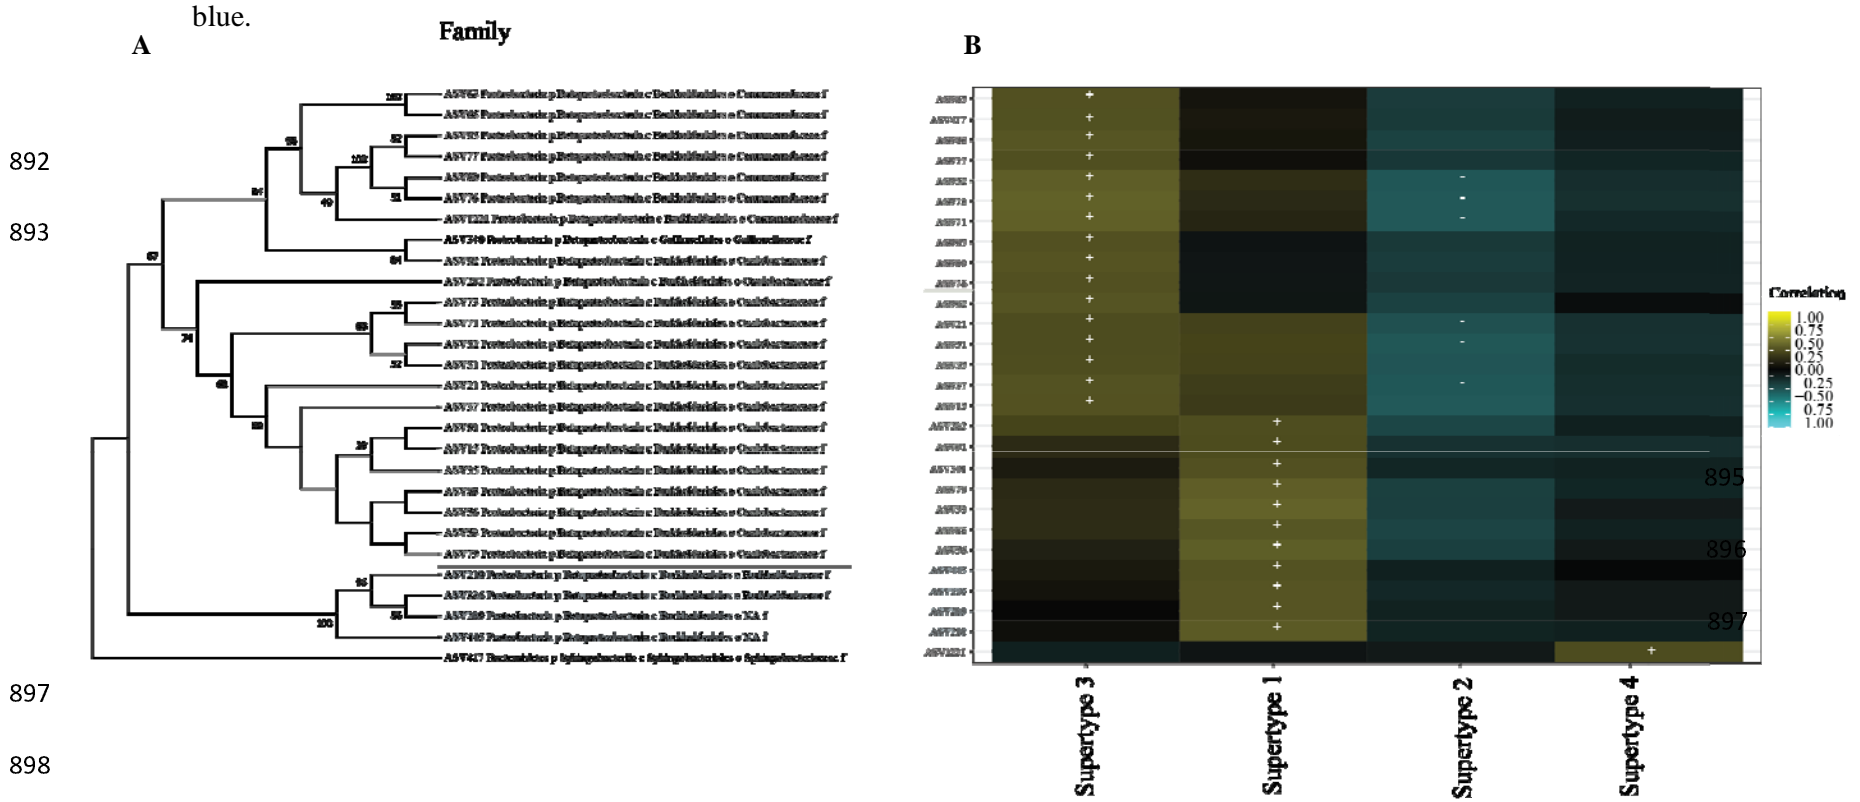

Source: https://www.biorxiv.org/content/10.1101/2023.04.12.536591v1.full.pdf
